# Supplementary material
Source: MDPI journal article supplement (https://www.mdpi.com/2311-5637/8/3/126)
Supplement: s1 [file s1]

Archive with 3 entries (3 files):
- Supplementary material S1.pdf
- Supplementary material S2.pdf
- Supplementary materials Tables S1, S2 and S3.pdf
