# Supplementary material
Source: MDPI journal article supplement (https://www.mdpi.com/2311-5637/8/3/126)
Supplement: s1 [file s1]

## CONSENT TO THE COLLECTING AND PROCESSING OF PERSONAL DATA

(Within the meaning of Regulation 2016/679 of the European Parliament and the Council (EU))

I (full name), \_\_\_\_\_ hereby declare that I have voluntarily provided my personal data in the attached questionnaire, regarding my nutritional and lifestyle, exclusively for research purposes. I consent to the collecting and processing of such personal data and acknowledge that the information provided represent the so-called “personal data” within the meaning of the Regulation 2016/679 of the European Parliament and the Council 2016/679 (article 13°) from P.E. and Council of 27 of April 2016 (on the protection of natural persons regarding the processing of personal data and on the free movement on such data and repealing Directive 95/46/EC (“GDPR”).

Date \_\_\_\_\_

Signature \_\_\_\_\_
