# Supplementary material
Source: MDPI journal article supplement (https://www.mdpi.com/2311-5637/8/3/126)
Supplement: s1 [file s1 › Supplementary materials Tables S1, S2 and S3.pdf]

**Table S1-** Bacterial quantification (log (CFU/mL), mean  $\pm$  SD) of the different bacterial populations present in the colonic fermentations for the different conditions. Different letters mark statistically significant ( $p < 0.05$ ) differences between each condition for each bacterial group at same sampling time. IC- inoculum control; SKM- skim milk; GOS- Galacto-oligosaccharide; FOS- fructo-oligosaccharides; MOS- mannan-oligosaccharides; SB- *Saccharomyces boulardii*.

| Condition          | Time | Bacterial concentration (log (CFU/mL)) |                                 |                                    |                                    |                                 |                                    |                                 |
|--------------------|------|----------------------------------------|---------------------------------|------------------------------------|------------------------------------|---------------------------------|------------------------------------|---------------------------------|
|                    |      | Firmicutes (Firm)                      | Bacteroidetes (Bdt)             | Lactobacillus group (Lac)          | Bacteroides (Bac)                  | Bifidobacterium (Bif)           | Enterobacteriaceae family (Enb)    | Clostridium cluster IV (CIV)    |
| IC                 | 0    | 7.83 $\pm$ 0.03 <sup>a</sup>           | 5.78 $\pm$ 0.23 <sup>a</sup>    | 3.01 $\pm$ 0.41 <sup>a</sup>       | 5.84 $\pm$ 0.52 <sup>a, b</sup>    | 5.15 $\pm$ 0.13 <sup>a</sup>    | 4.57 $\pm$ 0.09 <sup>a</sup>       | 4.72 $\pm$ 0.19 <sup>a</sup>    |
|                    | 24   | 8.01 $\pm$ 0.27 <sup>c</sup>           | 6.83 $\pm$ 0.19 <sup>a</sup>    | 3.64 $\pm$ 0.08 <sup>c</sup>       | 7.40 $\pm$ 0.09 <sup>b, c</sup>    | 4.86 $\pm$ 0.25 <sup>b, c</sup> | 6.37 $\pm$ 0.23 <sup>a</sup>       | 3.75 $\pm$ 0.24 <sup>e</sup>    |
|                    | 48   | 7.78 $\pm$ 0.03 <sup>a</sup>           | 7.38 $\pm$ 0.23 <sup>a</sup>    | 4.02 $\pm$ 0.10 <sup>d</sup>       | 7.20 $\pm$ 0.09 <sup>a</sup>       | 4.72 $\pm$ 0.14 <sup>a</sup>    | 6.63 $\pm$ 0.10 <sup>a</sup>       | 4.24 $\pm$ 0.22 <sup>a, b</sup> |
| SKM                | 0    | 8.47 $\pm$ 0.02 <sup>b</sup>           | 6.93 $\pm$ 0.06 <sup>b</sup>    | 3.22 $\pm$ 0.04 <sup>a</sup>       | 6.44 $\pm$ 0.12 <sup>b, c</sup>    | 5.45 $\pm$ 0.12 <sup>a, b</sup> | 5.15 $\pm$ 0.05 <sup>b</sup>       | 5.30 $\pm$ 0.08 <sup>b</sup>    |
|                    | 24   | 7.35 $\pm$ 0.19 <sup>a</sup>           | 6.74 $\pm$ 0.11 <sup>a</sup>    | 2.62 $\pm$ 0.27 <sup>b</sup>       | 6.86 $\pm$ 0.07 <sup>a, b</sup>    | 4.54 $\pm$ 0.08 <sup>b</sup>    | 6.49 $\pm$ 0.18 <sup>a, b</sup>    | 2.87 $\pm$ 0.14 <sup>b</sup>    |
|                    | 48   | 8.18 $\pm$ 0.06 <sup>b</sup>           | 7.96 $\pm$ 0.22 <sup>b, c</sup> | 2.55 $\pm$ 0.05 <sup>a, b, c</sup> | 6.97 $\pm$ 0.52 <sup>a</sup>       | 5.29 $\pm$ 0.12 <sup>b</sup>    | 7.02 $\pm$ 0.04 <sup>c</sup>       | 4.93 $\pm$ 0.17 <sup>c</sup>    |
| SKM + 1% (w/v) GOS | 0    | 8.40 $\pm$ 0.35 <sup>b</sup>           | 6.71 $\pm$ 0.35 <sup>b</sup>    | 3.05 $\pm$ 0.31 <sup>a</sup>       | 7.03 $\pm$ 0.37 <sup>c</sup>       | 5.54 $\pm$ 0.30 <sup>b</sup>    | 5.05 $\pm$ 0.38 <sup>b</sup>       | 5.44 $\pm$ 0.23 <sup>b</sup>    |
|                    | 24   | 7.71 $\pm$ 0.09 <sup>b, c</sup>        | 6.69 $\pm$ 0.16 <sup>a</sup>    | 2.37 $\pm$ 0.17 <sup>b</sup>       | 7.16 $\pm$ 0.08 <sup>a, b, c</sup> | 5.02 $\pm$ 0.24 <sup>c</sup>    | 6.59 $\pm$ 0.01 <sup>a, b, c</sup> | 3.05 $\pm$ 0.09 <sup>b, c</sup> |
|                    | 48   | 7.89 $\pm$ 0.31 <sup>a, b</sup>        | 7.88 $\pm$ 0.17 <sup>b, c</sup> | 2.32 $\pm$ 0.25 <sup>a, b</sup>    | 7.41 $\pm$ 0.42 <sup>a, b</sup>    | 4.93 $\pm$ 0.44 <sup>a, b</sup> | 6.95 $\pm$ 0.12 <sup>b, c</sup>    | 4.06 $\pm$ 0.67 <sup>a</sup>    |
| SKM + 1% (w/v) MOS | 0    | 8.28 $\pm$ 0.04 <sup>b</sup>           | 6.74 $\pm$ 0.04 <sup>b</sup>    | 2.97 $\pm$ 0.02 <sup>a</sup>       | 6.17 $\pm$ 0.10 <sup>a, b</sup>    | 5.36 $\pm$ 0.08 <sup>a, b</sup> | 4.84 $\pm$ 0.03 <sup>a, b</sup>    | 5.23 $\pm$ 0.04 <sup>b</sup>    |

|                              |           |                           |                        |                        |                        |                        |                        |                           |
|------------------------------|-----------|---------------------------|------------------------|------------------------|------------------------|------------------------|------------------------|---------------------------|
|                              | <b>24</b> | $8.00 \pm 0.01^{b, c}$    | $7.06 \pm 0.08^b$      | $1.86 \pm 0.41^a$      | $7.36 \pm 0.15^{b, c}$ | $4.09 \pm 0.02^a$      | $6.45 \pm 0.10^{a, b}$ | $2.46 \pm 0.17^a$         |
|                              | <b>48</b> | $8.51 \pm 0.05^c$         | $7.85 \pm 0.22^{b, c}$ | $2.98 \pm 0.12^c$      | $7.40 \pm 0.14^{a, b}$ | $4.73 \pm 0.13^a$      | $6.83 \pm 0.02^b$      | $4.74 \pm 0.11^{b, c}$    |
| <b>SKM + 1% (w/v) FOS</b>    | <b>0</b>  | $8.37 \pm 0.29^b$         | $6.60 \pm 0.28^b$      | $3.01 \pm 0.37^a$      | $5.73 \pm 0.18^a$      | $5.71 \pm 0.18^b$      | $5.02 \pm 0.28^{a, b}$ | $5.34 \pm 0.18^b$         |
|                              | <b>24</b> | $7.68 \pm 0.08^{a, b, c}$ | $7.37 \pm 0.11^c$      | $3.21 \pm 0.25^c$      | $6.77 \pm 0.35^a$      | $5.78 \pm 0.28^d$      | $6.83 \pm 0.04^c$      | $4.20 \pm 0.07^f$         |
|                              | <b>48</b> | $8.73 \pm 0.09^c$         | $8.32 \pm 0.04^d$      | $4.31 \pm 0.07^d$      | $7.98 \pm 0.07^b$      | $6.67 \pm 0.10^c$      | $6.92 \pm 0.12^{b, c}$ | $5.49 \pm 0.05^d$         |
| <b>SKM + 1% (w/v) SB</b>     | <b>0</b>  | $8.38 \pm 0.06^b$         | $6.80 \pm 0.05^b$      | $2.95 \pm 0.03^a$      | $5.91 \pm 0.16^{a, b}$ | $5.44 \pm 0.04^{a, b}$ | $5.13 \pm 0.12^b$      | $5.38 \pm 0.08^b$         |
|                              | <b>24</b> | $7.86 \pm 0.05^{b, c}$    | $7.82 \pm 0.09^c$      | $2.49 \pm 0.13^b$      | $7.43 \pm 0.08^c$      | $4.85 \pm 0.12^{b, c}$ | $6.70 \pm 0.09^{b, c}$ | $3.50 \pm 0.27^{d, e}$    |
|                              | <b>48</b> | $7.85 \pm 0.06^a$         | $7.77 \pm 0.06^{b, c}$ | $2.79 \pm 0.08^{b, c}$ | $7.15 \pm 0.35^a$      | $5.06 \pm 0.08^{a, b}$ | $6.80 \pm 0.06^{a, b}$ | $4.46 \pm 0.03^{a, b, c}$ |
| <b>SKM + 1% (w/v) inulin</b> | <b>0</b>  | $8.17 \pm 0.13^{a, b}$    | $6.89 \pm 0.15^b$      | $2.92 \pm 0.09^a$      | $5.93 \pm 0.22^{a, b}$ | $5.37 \pm 0.14^{a, b}$ | $5.10 \pm 0.20^b$      | $5.23 \pm 0.16^b$         |
|                              | <b>24</b> | $7.67 \pm 0.20^{a, b}$    | $7.57 \pm 0.24^c$      | $2.21 \pm 0.28^{a, b}$ | $6.75 \pm 0.61^a$      | $4.86 \pm 0.03^{b, c}$ | $6.39 \pm 0.09^a$      | $3.28 \pm 0.08^{c, d}$    |
|                              | <b>48</b> | $7.74 \pm 0.24^a$         | $7.59 \pm 0.25^{a, b}$ | $2.16 \pm 0.60^a$      | $7.37 \pm 0.47^{a, b}$ | $5.21 \pm 0.03^b$      | $6.87 \pm 0.11^{b, c}$ | $4.49 \pm 0.10^{a, b, c}$ |

**Table S2-** Concentration (mM, means  $\pm$  SD) of the different organic acids produced during 48 h of colonic fermentation. Nd- not detected. Different letters mark statistically significant ( $p < 0.05$ ) differences between each condition at same sampling time. IC- inoculum control; SKM- skim milk; GOS- Galacto-oligosaccharide; FOS- fructo-oligosaccharides; MOS- mannan-oligosaccharides; SB- *Saccharomyces boulardii*.

|           |          | Concentration (mM)              |                                  |                                  |                                 |                                    |                                    |                  |              |            |
|-----------|----------|---------------------------------|----------------------------------|----------------------------------|---------------------------------|------------------------------------|------------------------------------|------------------|--------------|------------|
| Condition | Time (h) | Lactate                         | Acetate                          | Propionate                       | Butyrate                        | Isobutyrate                        | Isovalerate                        | Sum SCFA (A+P+B) | Ratio A:P: B | Ratio P: A |
| IC        | 0        | Nd                              | Nd                               | Nd                               | Nd                              | Nd                                 | Nd                                 | 0.00             | Nd           | Nd         |
|           | 6        | 0.08 $\pm$ 0.04 <sup>a</sup>    | 2.63 $\pm$ 0.15 <sup>a</sup>     | Nd <sup>a</sup>                  | Nd <sup>a</sup>                 | 0.59 $\pm$ 0.06 <sup>b, c</sup>    | Nd <sup>a</sup>                    | 2.63             | Nd           | Nd         |
|           | 24       | Nd <sup>a</sup>                 | 8.27 $\pm$ 2.16 <sup>a</sup>     | 5.11 $\pm$ 1.45 <sup>a</sup>     | 0.48 $\pm$ 0.48 <sup>a</sup>    | 0.74 $\pm$ 0.10 <sup>a, b</sup>    | 1.15 $\pm$ 0.13 <sup>a, b</sup>    | 13.85            | 17:11:1      | 0.62       |
|           | 30       | Nd <sup>a</sup>                 | 10.74 $\pm$ 2.00 <sup>a</sup>    | 5.21 $\pm$ 1.80 <sup>a</sup>     | 0.80 $\pm$ 0.57 <sup>a</sup>    | 0.80 $\pm$ 0.04 <sup>a</sup>       | 1.21 $\pm$ 0.15 <sup>a</sup>       | 16.74            | 13:7:1       | 0.48       |
|           | 48       | Nd                              | 16.31 $\pm$ 2.99 <sup>a</sup>    | 6.71 $\pm$ 1.11 <sup>a</sup>     | 1.70 $\pm$ 0.72 <sup>a</sup>    | 1.15 $\pm$ 0.25 <sup>a, b</sup>    | 1.39 $\pm$ 0.05 <sup>a</sup>       | 24.72            | 10:4:1       | 0.41       |
| SKM       | 0        | Nd                              | Nd                               | Nd                               | Nd                              | Nd                                 | Nd                                 | 0.00             | Nd           | Nd         |
|           | 6        | 11.37 $\pm$ 1.97 <sup>d</sup>   | 13.80 $\pm$ 1.10 <sup>b, c</sup> | 2.55 $\pm$ 0.09 <sup>b</sup>     | 1.10 $\pm$ 0.18 <sup>b</sup>    | 0.43 $\pm$ 0.02 <sup>a</sup>       | 0.32 $\pm$ 0.05 <sup>b</sup>       | 17.46            | 13:2:1       | 0.18       |
|           | 24       | 3.85 $\pm$ 0.48 <sup>b, c</sup> | 37.96 $\pm$ 5.12 <sup>c, d</sup> | 11.57 $\pm$ 0.38 <sup>b</sup>    | 5.30 $\pm$ 0.51 <sup>b, c</sup> | 0.59 $\pm$ 0.15 <sup>a, b</sup>    | 1.78 $\pm$ 0.60 <sup>a, b, c</sup> | 54.83            | 7:2:1        | 0.30       |
|           | 30       | Nd                              | 46.44 $\pm$ 3.06 <sup>c</sup>    | 13.19 $\pm$ 0.55 <sup>b, c</sup> | 7.67 $\pm$ 1.01 <sup>d</sup>    | 0.39 $\pm$ 0.15 <sup>a</sup>       | 1.85 $\pm$ 0.55 <sup>a, b</sup>    | 67.30            | 6:2:1        | 0.28       |
|           | 48       | Nd                              | 50.03 $\pm$ 3.90 <sup>c</sup>    | 18.03 $\pm$ 0.35 <sup>b, c</sup> | 6.39 $\pm$ 0.08 <sup>d</sup>    | 1.59 $\pm$ 0.10 <sup>a, b, c</sup> | 4.01 $\pm$ 0.38 <sup>c, d</sup>    | 74.45            | 8:3:1        | 0.36       |

|                           |           |                             |                              |                           |                             |                             |                                |       |        |      |
|---------------------------|-----------|-----------------------------|------------------------------|---------------------------|-----------------------------|-----------------------------|--------------------------------|-------|--------|------|
|                           | <b>0</b>  | Nd                          | Nd                           | Nd                        | Nd                          | Nd                          | Nd                             | 0.00  | Nd     | Nd   |
|                           | <b>6</b>  | 11.92 ± 0.68 <sup>d</sup>   | 14.15 ± 1.45 <sup>b, c</sup> | 2.56 ± 0.06 <sup>b</sup>  | 0.96 ± 0.09 <sup>b</sup>    | 0.69 ± 0.03 <sup>c, d</sup> | 0.38 ± 0.03 <sup>b</sup>       | 17.66 | 15:3:1 | 0.18 |
| <b>SKM + 1% (w/v) GOS</b> | <b>24</b> | 3.88 ± 1.93 <sup>b, c</sup> | 33.35 ± 3.18 <sup>c</sup>    | 10.99 ± 0.97 <sup>b</sup> | 3.91 ± 0.40 <sup>b</sup>    | 0.73 ± 0.49 <sup>a, b</sup> | 2.20 ± 1.27 <sup>b, c</sup>    | 48.25 | 9:3:1  | 0.33 |
|                           | <b>30</b> | Nd                          | 42.56 ± 2.08 <sup>c</sup>    | 14.69 ± 0.36 <sup>c</sup> | 4.93 ± 0.92 <sup>b, c</sup> | 0.71 ± 0.45 <sup>a</sup>    | 1.99 ± 0.98 <sup>a, b, c</sup> | 62.18 | 9:3:1  | 0.35 |
|                           | <b>48</b> | Nd                          | 42.93 ± 3.70 <sup>b, c</sup> | 17.28 ± 0.25 <sup>b</sup> | 5.10 ± 0.35 <sup>b, c</sup> | 1.98 ± 0.16 <sup>c</sup>    | 4.27 ± 0.52 <sup>c, d</sup>    | 65.31 | 8:3:1  | 0.40 |
|                           | <b>0</b>  | Nd                          | Nd                           | Nd                        | Nd                          | Nd                          | Nd                             | 0.00  | Nd     | Nd   |
|                           | <b>6</b>  | 7.36 ± 0.45 <sup>c</sup>    | 12.10 ± 0.20 <sup>b</sup>    | 2.52 ± 0.35 <sup>b</sup>  | 0.92 ± 0.09 <sup>b</sup>    | 0.68 ± 0.01 <sup>c, d</sup> | 0.39 ± 0.01 <sup>b</sup>       | 15.53 | 13:3:1 | 0.21 |
| <b>SKM + 1% (w/v) MOS</b> | <b>24</b> | 6.41 ± 1.44 <sup>c</sup>    | 18.91 ± 1.31 <sup>b</sup>    | 9.21 ± 2.55 <sup>b</sup>  | 1.86 ± 0.60 <sup>a</sup>    | 0.20 ± 0.13 <sup>a</sup>    | 0.55 ± 0.14 <sup>a</sup>       | 29.97 | 10:5:1 | 0.49 |
|                           | <b>30</b> | Nd                          | 27.81 ± 2.95 <sup>b</sup>    | 10.76 ± 2.21 <sup>b</sup> | 3.46 ± 0.10 <sup>b</sup>    | 0.42 ± 0.26 <sup>a</sup>    | 1.36 ± 0.70 <sup>a</sup>       | 42.03 | 8:3:1  | 0.39 |
|                           | <b>48</b> | Nd                          | 38.41 ± 6.02 <sup>b</sup>    | 16.08 ± 2.50 <sup>b</sup> | 4.48 ± 0.13 <sup>b</sup>    | 0.91 ± 0.54 <sup>a</sup>    | 2.16 ± 0.79 <sup>a, b</sup>    | 58.97 | 9:4:1  | 0.42 |
|                           | <b>0</b>  | Nd                          | Nd                           | Nd                        | Nd                          | Nd                          | Nd                             | 0.00  | Nd     | Nd   |
|                           | <b>6</b>  | 25.69 ± 0.83 <sup>c</sup>   | 35.49 ± 3.80 <sup>d</sup>    | 2.64 ± 0.01 <sup>b</sup>  | 1.23 ± 0.28 <sup>b</sup>    | 0.41 ± 0.06 <sup>a</sup>    | 0.40 ± 0.09 <sup>b</sup>       | 39.36 | 29:2:1 | 0.07 |
| <b>SKM + 1% (w/v) FOS</b> | <b>24</b> | Nd <sup>a</sup>             | 57.71 ± 1.48 <sup>e</sup>    | 20.27 ± 0.53 <sup>c</sup> | 5.61 ± 0.41 <sup>c</sup>    | 0.42 ± 0.05 <sup>a, b</sup> | 1.49 ± 0.06 <sup>a, b, c</sup> | 83.59 | 10:4:1 | 0.35 |
|                           | <b>30</b> | Nd                          | 59.26 ± 2.12 <sup>d</sup>    | 21.62 ± 0.91 <sup>d</sup> | 5.63 ± 0.06 <sup>c</sup>    | 1.20 ± 0.50 <sup>a</sup>    | 3.35 ± 0.95 <sup>b, c</sup>    | 86.50 | 11:4:1 | 0.36 |

|                                  |           |                       |                        |                    |                       |                       |                         |       |        |      |
|----------------------------------|-----------|-----------------------|------------------------|--------------------|-----------------------|-----------------------|-------------------------|-------|--------|------|
|                                  | <b>48</b> | Nd                    | $62.74 \pm 0.66^d$     | $24.27 \pm 0.48^d$ | $5.50 \pm 0.28^{c,d}$ | $1.91 \pm 0.13^{b,c}$ | $4.65 \pm 0.05^d$       | 92.50 | 11:4:1 | 0.39 |
| <b>SKM + 1% (w/v) SB</b>         | <b>0</b>  | Nd                    | Nd                     | Nd                 | Nd                    | Nd                    | Nd                      | 0.00  | Nd     | Nd   |
|                                  | <b>6</b>  | $9.59 \pm 0.32^{c,d}$ | $16.61 \pm 0.47^c$     | $2.46 \pm 0.17^b$  | $1.01 \pm 0.10^b$     | $0.79 \pm 0.05^d$     | $0.68 \pm 0.12^c$       | 20.07 | 16:2:1 | 0.15 |
|                                  | <b>24</b> | $1.97 \pm 1.97^{a,b}$ | $42.78 \pm 2.26^d$     | $11.77 \pm 0.17^b$ | $4.68 \pm 0.59^{b,c}$ | $0.76 \pm 0.07^b$     | $2.84 \pm 0.37^c$       | 59.23 | 9:3:1  | 0.28 |
|                                  | <b>30</b> | Nd                    | $44.55 \pm 2.38^c$     | $16.18 \pm 0.24^c$ | $5.56 \pm 0.13^c$     | $1.29 \pm 0.55^a$     | $3.89 \pm 1.00^c$       | 66.30 | 8:3:1  | 0.36 |
|                                  | <b>48</b> | Nd                    | $46.15 \pm 2.70^{b,c}$ | $20.35 \pm 0.31^c$ | $5.65 \pm 0.11^{c,d}$ | $2.04 \pm 0.06^c$     | $5.12 \pm 0.07^d$       | 72.14 | 8:4:1  | 0.44 |
| <b>SKM + 1% (w/v)<br/>inulin</b> | <b>0</b>  | Nd                    | Nd                     | Nd                 | Nd                    | Nd                    | Nd                      | 0.00  | Nd     | Nd   |
|                                  | <b>6</b>  | $3.40 \pm 0.26^b$     | $13.60 \pm 0.22^{b,c}$ | $2.29 \pm 0.63^b$  | $1.33 \pm 0.43^b$     | $0.51 \pm 0.08^{a,b}$ | $0.43 \pm 0.09^b$       | 17.22 | 10:2:1 | 0.17 |
|                                  | <b>24</b> | $1.24 \pm 1.24^{a,b}$ | $41.84 \pm 4.17^d$     | $11.34 \pm 0.57^b$ | $4.62 \pm 1.03^{b,c}$ | $0.89 \pm 0.02^b$     | $2.40 \pm 0.24^{b,c}$   | 57.80 | 9:2:1  | 0.27 |
|                                  | <b>30</b> | Nd                    | $43.29 \pm 3.76^c$     | $14.45 \pm 0.71^c$ | $4.99 \pm 0.62^{b,c}$ | $0.81 \pm 0.04^a$     | $3.05 \pm 0.29^{a,b,c}$ | 62.73 | 9:3:1  | 0.33 |
|                                  | <b>48</b> | Nd                    | $46.08 \pm 5.09^{b,c}$ | $17.04 \pm 0.75^b$ | $5.23 \pm 0.47^{b,c}$ | $1.13 \pm 0.41^a$     | $3.27 \pm 0.53^{b,c}$   | 68.34 | 9:3:1  | 0.37 |

**Table S3-** Concentration (mM, means  $\pm$  SD) of total ammonia nitrogen produced during 48 h of colonic fermentation. Different letters mark statistically significant ( $p < 0.05$ ) differences between each condition at same sampling time. IC- inoculum control; SKM- skim milk; GOS- Galacto-oligosaccharide; FOS- fructo-oligosaccharides; MOS- mannan-oligosaccharides; SB- *Saccharomyces boulardii*.

|                                | Time (h) | Condition                     |                                  |                                  |                               |                                  |                                  |                                  |
|--------------------------------|----------|-------------------------------|----------------------------------|----------------------------------|-------------------------------|----------------------------------|----------------------------------|----------------------------------|
|                                |          | IC                            | SKM                              | SKM + 1%<br>(w/v) GOS            | SKM + 1%<br>(w/v) MOS         | SKM + 1%<br>(w/v) FOS            | SKM + 1%<br>(w/v) SB             | SKM + 1% (w/v)<br>inulin         |
| Total ammonia nitrogen<br>(mM) | 0        | 1.64 $\pm$ 0.05 <sup>a</sup>  | 3.44 $\pm$ 0.10 <sup>c</sup>     | 9.31 $\pm$ 0.31 <sup>f</sup>     | 8.65 $\pm$ 0.53 <sup>f</sup>  | 2.51 $\pm$ 0.01 <sup>b</sup>     | 6.12 $\pm$ 0.12 <sup>e</sup>     | 4.91 $\pm$ 0.01 <sup>d</sup>     |
|                                | 6        | 11.47 $\pm$ 0.34 <sup>c</sup> | 8.47 $\pm$ 0.06 <sup>a</sup>     | 10.98 $\pm$ 0.11 <sup>b, c</sup> | 10.43 $\pm$ 0.63 <sup>b</sup> | 10.55 $\pm$ 0.05 <sup>b</sup>    | 15.00 $\pm$ 0.09 <sup>d</sup>    | 11.04 $\pm$ 0.46 <sup>b, c</sup> |
|                                | 24       | 21.26 $\pm$ 2.77 <sup>a</sup> | 31.53 $\pm$ 1.98 <sup>b</sup>    | 36.40 $\pm$ 2.52 <sup>c</sup>    | 23.13 $\pm$ 0.84 <sup>a</sup> | 27.84 $\pm$ 0.42 <sup>b</sup>    | 31.64 $\pm$ 0.93 <sup>b</sup>    | 28.67 $\pm$ 2.61 <sup>b</sup>    |
|                                | 30       | 25.41 $\pm$ 2.62 <sup>a</sup> | 36.24 $\pm$ 2.39 <sup>c, d</sup> | 39.65 $\pm$ 2.25 <sup>d</sup>    | 31.08 $\pm$ 1.89 <sup>b</sup> | 32.77 $\pm$ 1.43 <sup>b, c</sup> | 36.33 $\pm$ 1.22 <sup>c, d</sup> | 30.76 $\pm$ 2.21 <sup>b</sup>    |
|                                | 48       | 29.27 $\pm$ 1.63 <sup>a</sup> | 42.44 $\pm$ 1.55 <sup>c, d</sup> | 45.82 $\pm$ 0.74 <sup>d</sup>    | 36.68 $\pm$ 1.71 <sup>b</sup> | 39.39 $\pm$ 0.76 <sup>b, c</sup> | 42.15 $\pm$ 0.09 <sup>c, d</sup> | 36.97 $\pm$ 3.66 <sup>b</sup>    |
